# Supplementary material for: Predicting surface abundance of federally threatened Jollyville Plateau Salamanders (Eurycea tonkawae) to inform management activities at a highly modified urban spring
Source: PeerJ. 2022 May 2;10:e13359. doi: 10.7717/peerj.13359 (PMC9070359; doi:10.7717/peerj.13359)
Supplement: Supplemental Information 2 — Salamander occurrence data, e.g., date, location, effort (columns A-G). Water chemistry data, e.g., temperature, pH (columns H-K). Rain accumulations (columns L-AF). [file peerj-10-13359-s002.csv]

Date	Day	Year	Sal_Count	Location	Effort_obj	Effort_time	Temp	pH	DO	Cond	Rain.1to30	Rain.1to60	Rain.1to90	Rain.1to120	Rain.1to150	Rain.1to180	Rain.31to60	Rain.31to90	Rain.31to120	Rain.31to150	Rain.31to180	Rain.61to90	Rain.61to120	Rain.61to150	Rain.61to180	Rain.91to120	Rain.91to150	Rain.91to180	Rain.121to150	Rain.121to180	Rain.151to181
5/20/2014	140	A	0	run	200		21.13	7.52	6.22	896	12.21	14.83	19.26	20.83	23.17	36.69	2.62	7.05	8.62	10.96	24.49	4.43	6.01	8.34	21.87	1.57	3.91	17.44	2.34	15.86	13.53
7/1/2014	182	A	0	run	219		25.09	7.65	6.14	688	3.55	24.57	26.92	31.01	32.77	34.25	21.02	23.38	27.46	29.23	30.7	2.35	6.44	8.2	9.68	4.09	5.85	7.32	1.77	3.24	1.47
7/24/2014	205	A	0	run	237						11.12	21.22	33.46	36.08	40.51	41.78	10.1	22.34	24.96	29.39	30.66	12.24	14.86	19.29	20.56	2.62	7.05	8.32	4.43	5.7	1.27
8/26/2014	238	A	0	run	70						0.41	10.06	14.67	34.49	36.96	41.07	9.65	14.26	34.08	36.55	40.66	4.61	24.43	26.89	31	19.82	22.29	26.4	2.47	6.58	4.11
9/24/2014	267	A	0	run	96						13.53	13.94	24.87	35.54	48.02	50.6	0.41	11.34	22.01	34.49	37.07	10.93	21.6	34.08	36.66	10.67	23.15	25.73	12.48	15.06	2.58
10/14/2014	287	A	0	culvert	15						14.41	16.27	25.9	28.44	38.55	51.01	1.86	11.49	14.03	24.14	36.6	9.63	12.17	22.28	34.75	2.54	12.65	25.12	10.11	22.57	12.46
10/14/2014	287	A	0	run	48						14.41	16.27	25.9	28.44	38.55	51.01	1.86	11.49	14.03	24.14	36.6	9.63	12.17	22.28	34.75	2.54	12.65	25.12	10.11	22.57	12.46
11/18/2014	322	A	0	run	90						5.19	9.34	21.89	22.92	34.03	44.17	4.16	16.7	17.73	28.85	38.98	12.54	13.57	24.69	34.83	1.03	12.15	22.28	11.12	21.25	10.13
1/5/2015	5	B	0	run	50						6.84	17.04	22.42	36	36.6	46.19	10.2	15.58	29.16	29.75	39.34	5.38	18.96	19.55	29.14	13.58	14.17	23.76	0.59	10.19	9.59
1/30/2015	30	B	0	run	64						12.44	15.69	28.1	31.36	44.85	45.2	3.25	15.66	18.92	32.41	32.76	12.41	15.67	29.16	29.51	3.26	16.75	17.1	13.49	13.84	0.35
2/13/2015	44	B	0	culvert	22						8.54	16.63	25.05	30.12	43.89	46.82	8.09	16.51	21.58	35.34	38.28	8.42	13.49	27.26	30.19	5.07	18.84	21.77	13.77	16.7	2.93
2/13/2015	44	B	0	run	31						8.54	16.63	25.05	30.12	43.89	46.82	8.09	16.51	21.58	35.34	38.28	8.42	13.49	27.26	30.19	5.07	18.84	21.77	13.77	16.7	2.93
3/19/2015	78	B	0	run	139						8.77	17.42	25.04	33.91	39.1	42.35	8.65	16.27	25.14	30.33	33.58	7.62	16.49	21.68	24.93	8.87	14.06	17.31	5.19	8.44	3.25
4/29/2015	119	B	1	culvert	148	20					5.41	17.41	19.95	32.39	35.64	48.22	12	14.53	26.98	30.23	42.8	2.53	14.98	18.22	30.8	12.45	15.69	28.27	3.25	15.82	12.58
4/29/2015	119	B	1	run	235	75	20.56	7.84	8.47	916.4	5.41	17.41	19.95	32.39	35.64	48.22	12	14.53	26.98	30.23	42.8	2.53	14.98	18.22	30.8	12.45	15.69	28.27	3.25	15.82	12.58
7/17/2015	198	B	2	culvert	192	20					7.32	35.37	51.51	56.07	64.84	73.49	28.04	44.19	48.75	57.52	66.17	16.15	20.71	29.48	38.13	4.56	13.33	21.98	8.77	17.42	8.65
7/17/2015	198	B	0	run	359	71	23.18	7.86	7.45	871.8	7.32	35.37	51.51	56.07	64.84	73.49	28.04	44.19	48.75	57.52	66.17	16.15	20.71	29.48	38.13	4.56	13.33	21.98	8.77	17.42	8.65
8/28/2015	240	B	3	culvert	163	20	23.72	6.96	4.4	977.2	0.32	1.17	10.43	47.27	52.68	64.67	0.86	10.11	46.95	52.37	64.35	9.25	46.1	51.51	63.49	36.84	42.26	54.24	5.41	17.39	11.98
8/28/2015	240	B	0	run	417	69	23.54	7.58	5.01	891.4	0.32	1.17	10.43	47.27	52.68	64.67	0.86	10.11	46.95	52.37	64.35	9.25	46.1	51.51	63.49	36.84	42.26	54.24	5.41	17.39	11.98
9/22/2015	265	B	1	culvert	208	20	24.76	6.73	5.03	971.9	4.14	4.46	5.37	31.14	52.85	56.9	0.32	1.23	27	48.71	52.75	0.91	26.68	48.39	52.44	25.77	47.48	51.53	21.71	25.76	4.05
9/22/2015	265	B	0	run	367	91	23.58	7.31	4.67	867.7	4.14	4.46	5.37	31.14	52.85	56.9	0.32	1.23	27	48.71	52.75	0.91	26.68	48.39	52.44	25.77	47.48	51.53	21.71	25.76	4.05
11/21/2015	325	B	1	culvert	98	20	21.19	7.13	6.21	883.1	35.39	35.44	39.58	39.9	40.81	66.58	0.05	4.2	4.51	5.42	31.19	4.14	4.46	5.37	31.14	0.32	1.23	27	0.91	26.68	25.77
11/21/2015	325	B	0	run	410	67	21.33	7.76	6.06	819.8	35.39	35.44	39.58	39.9	40.81	66.58	0.05	4.2	4.51	5.42	31.19	4.14	4.46	5.37	31.14	0.32	1.23	27	0.91	26.68	25.77
12/29/2015	363	B	0	culvert	125	20					7.42	29.34	46.57	50.76	51.08	51.12	21.92	39.15	43.34	43.66	43.7	17.23	21.42	21.74	21.78	4.2	4.51	4.56	0.32	0.36	0.04
12/29/2015	363	B	0	run	538	57	18.9	7.88	5.9	798.2	7.42	29.34	46.57	50.76	51.08	51.12	21.92	39.15	43.34	43.66	43.7	17.23	21.42	21.74	21.78	4.2	4.51	4.56	0.32	0.36	0.04
3/26/2016	85	C	0	culvert	331	40	21.27	6.99	4.71	957.6	11.08	15.64	19.51	27.73	46.06	63.28	4.56	8.43	16.65	34.98	52.21	3.87	12.09	30.42	47.65	8.22	26.55	43.77	18.33	35.55	17.23
3/26/2016	85	C	0	run	432	95	20.34	7.93	6.89	910.5	11.08	15.64	19.51	27.73	46.06	63.28	4.56	8.43	16.65	34.98	52.21	3.87	12.09	30.42	47.65	8.22	26.55	43.77	18.33	35.55	17.23
6/28/2016	179	C	3	culvert	185	20	22.42	6.93	4.58	1005	12.19	24.83	38.93	50.01	54.57	55.57	12.64	26.75	37.82	42.38	43.39	14.11	25.18	29.74	30.74	11.08	15.64	16.64	4.56	5.56	1
6/28/2016	179	C	0	run	333	20	23.75	7.83	6.47	951.6	12.19	24.83	38.93	50.01	54.57	55.57	12.64	26.75	37.82	42.38	43.39	14.11	25.18	29.74	30.74	11.08	15.64	16.64	4.56	5.56	1
9/29/2016	272	C	0	culvert	108	20	23.17	6.98	4.58	894.1	5.5	24.21	26.35	38.46	51.93	65.85	18.72	20.85	32.96	46.43	60.35	2.14	14.25	27.71	41.64	12.11	25.58	39.5	13.47	27.39	13.93
9/29/2016	272	C	0	run	199	20	21.49	7.76	5.09	817.7	5.5	24.21	26.35	38.46	51.93	65.85	18.72	20.85	32.96	46.43	60.35	2.14	14.25	27.71	41.64	12.11	25.58	39.5	13.47	27.39	13.93
11/29/2016	333	C	0	culvert	147	26	22.3	7.5	6.6	888.5	9.67	10.77	15.7	34.99	37.12	46.43	1.1	6.02	25.32	27.45	36.75	4.92	24.21	26.35	35.65	19.29	21.43	30.73	2.14	11.44	9.3
11/29/2016	333	C	0	run	222	20	19.4	8.2	7.3	785	9.67	10.77	15.7	34.99	37.12	46.43	1.1	6.02	25.32	27.45	36.75	4.92	24.21	26.35	35.65	19.29	21.43	30.73	2.14	11.44	9.3
1/27/2017	27	D	2	culvert	142	26	19.25	7.9	7.3	865	10.52	16.54	26.19	27.29	32.79	51.5	6.02	15.66	16.76	22.26	40.98	9.65	10.75	16.25	34.96	1.1	6.6	25.32	5.5	24.21	18.72
1/27/2017	27	D	0	run	181	20	17.2	8.5	8.5	802	10.52	16.54	26.19	27.29	32.79	51.5	6.02	15.66	16.76	22.26	40.98	9.65	10.75	16.25	34.96	1.1	6.6	25.32	5.5	24.21	18.72
3/21/2017	80	D	0	culvert	237	29	21.5	7.75		913.5	7.6	10.04	20.57	27.11	36.17	41.32	2.44	12.98	19.51	28.57	33.72	10.54	17.07	26.13	31.28	6.53	15.6	20.74	9.06	14.21	5.15
3/21/2017	80	D	0	run	217	20	20.7	8.4		829	7.6	10.04	20.57	27.11	36.17	41.32	2.44	12.98	19.51	28.57	33.72	10.54	17.07	26.13	31.28	6.53	15.6	20.74	9.06	14.21	5.15
5/24/2017	144	D	0	culvert	168	20	23.05	7.75	6.15	854.5	6.65	14.11	18.83	24.09	34.62	40.63	7.45	12.18	17.44	27.97	33.98	4.72	9.98	20.51	26.52	5.26	15.79	21.8	10.53	16.54	6.01
5/24/2017	144	D	0	run	217	20					6.65	14.11	18.83	24.09	34.62	40.63	7.45	12.18	17.44	27.97	33.98	4.72	9.98	20.51	26.52	5.26	15.79	21.8	10.53	16.54	6.01
7/18/2017	199	D	1	culvert	123	20	24.8	7.4	4.9	865	5.31	14.91	16.89	24.21	31.81	35.67	9.6	11.58	18.9	26.5	30.36	1.98	9.3	16.9	20.76	7.32	14.91	18.77	7.6	11.46	3.86
7/18/2017	199	D	0	run	143	20	26.5	7.8	5.9	716	5.31	14.91	16.89	24.21	31.81	35.67	9.6	11.58	18.9	26.5	30.36	1.98	9.3	16.9	20.76	7.32	14.91	18.77	7.6	11.46	3.86
9/13/2017	256	D	0	culvert	99	20	24.85	7.65		832.5	16.71	27.47	30.92	40.81	42.53	49.83	10.76	14.21	24.09	25.82	33.12	3.45	13.34	15.06	22.36	9.88	11.61	18.91	1.73	9.03	7.3
9/13/2017	256	D	0	run	130	20	24.1	7.8		748	16.71	27.47	30.92	40.81	42.53	49.83	10.76	14.21	24.09	25.82	33.12	3.45	13.34	15.06	22.36	9.88	11.61	18.91	1.73	9.03	7.3
11/17/2017	321	D	0	culvert	206	20	23.15	7.5	5.45	879.5	4.13	13.16	29.87	38.75	44.08	51.1	9.03	25.74	34.62	39.95	46.98	16.71	25.59	30.92	37.95	8.88	14.21	21.23	5.33	12.36	7.02
11/17/2017	321	D	0	run	302	20	22.4	7.9	7.1	762	4.13	13.16	29.87	38.75	44.08	51.1	9.03	25.74	34.62	39.95	46.98	16.71	25.59	30.92	37.95	8.88	14.21	21.23	5.33	12.36	7.02
1/23/2018	23	E	1	culvert	193	20	19.85	7.8	7.65	894.5	0.9	12.6	14.85	25.76	42.39	51.12	11.7	13.94	24.85	41.49	50.22	2.25	13.16	29.79	38.52	10.91	27.55	36.27	16.64	25.36	8.72
1/23/2018	23	E	0	run	120	20	17	8	9.9	785	0.9	12.6	14.85	25.76	42.39	51.12	11.7	13.94	24.85	41.49	50.22	2.25	13.16	29.79	38.52	10.91	27.55	36.27	16.64	25.36	8.72
4/6/2018	96	E	0	culvert	127	20	22.25	7.35	6.85	905	10.44	17.37	18.25	27.77	30.57	34.25	6.93	7.81	17.34	20.13	23.81	0.88	10.4	13.2	16.88	9.53	12.32	16	2.79	6.48	3.68
6/5/2018	156	E	0	culvert	187	20	23.7	7.3	6.6	837.5	2.57	8.67	19.11	26.05	26.92	36.45	6.11	16.55	23.48	24.36	33.88	10.44	17.37	18.25	27.77	6.93	7.81	17.34	0.88	10.4	9.53
8/3/2018	215	E	0	culvert	139	20	25.9	7.15	8.7	929.5	9.68	12.5	17.27	19.44	29.88	36.87	2.82	7.59	9.77	20.21	27.19	4.78	6.95	17.39	24.37	2.17	12.61	19.6	10.44	17.42	6.99
10/4/2018	277	E	0	culvert	204	20	25.4	7.1	4.65	861.5	21.82	24.55	30.89	35.32	37.88	43.99	2.73	9.07	13.5	16.07	22.17	6.34	10.77	13.34	19.44	4.43	7	13.11	2.57	8.67	6.11
12/4/2018	338	E	2	culvert	317	85	20.3	7.15	5.3	916	5.08	27.33	48.67	51.88	58.01	62.65	22.25	43.59	46.8	52.93	57.57	21.34	24.55	30.68	35.32	3.21	9.35	13.98	6.13	10.77	4.64
2/6/2019	37	F	1	culvert	235	26	22.85	6.5	3.4	942.5	3.3	21.3	27.17	49.9	66.85	74.8	18	23.86	46.6	63.55	71.5	5.87	28.6	45.55	53.51	22.73	39.69	47.64	16.95	24.9	7.95
4/9/2019	99	F	0	culvert	161	26	21.6	6.6	5.15	921.5	9.6	11.43	14.71	28.11	36.36	56.12	1.83	5.11	18.5	26.76	46.52	3.28	16.68	24.93	44.69	13.4	21.65	41.41	8.26	28.02	19.76
6/4/2019	155	F	3	culvert	137	45	22.4	6.6	4.3	954	7.94	27.39	29.64	31.24	34.54	54.17	19.46	21.7	23.3	26.61	46.23	2.25	3.85	7.15	26.77	1.6	4.9	24.52	3.3	22.92	19.62
8/7/2019	219	F	1	culvert	290	60	24.65	6.6	3.75	949	1.19	11.33	22.36	37.3	46.9	48.73	10.13	21.17	36.11	45.71	47.54	11.04	25.97	35.57	37.4	14.94	24.54	26.37	9.6	11.43	1.83
10/3/2019	276	F	0	culvert	174	40	26.9	7.6	6.95	549.5	1.37	1.63	2.59	18.88	26.82	46.28	0.25	1.22	17.51	25.45	44.91	0.97	17.26	25.2	44.65	16.29	24.23	43.69	7.94	27.39	19.46
12/5/2019	339	F	0	culvert	195	30	17.8	6.8	4.5	855	2.71	10.82	12.19	12.22	13.41	23.55	8.12	9.49	9.51	10.71	20.84	1.37	1.4	2.59	12.73	0.03	1.22	11.35	1.19	11.33	10.13
2/5/2020	36	G	0	culvert	341	100	16.8	6.9	19.4	933	7.11	9.97	12.68	20.79	22.16	22.19	2.86	5.57	13.68	15.05	15.08	2.71	10.82	12.19	12.22	8.12	9.49	9.51	1.37	1.4	0.03
6/11/2020	163	G	2	culvert	158	135	18.9	7.6	5.8	896	13.15	17.06	28.48	37.59	43.69	47.71	3.91	15.33	24.44	30.54	34.56	11.42	20.53	26.63	30.65	9.11	15.21	19.23	6.1	10.12	4.02
7/15/2020	197	G	2	culvert	153	45	21	7	2.9	907	6.21	16.29	22.25	34.46	39.53	49.59	10.08	16.04	28.26	33.32	43.39	5.96	18.17	23.24	33.3	12.21	17.28	27.34	5.07	15.13	10.06
8/13/2020	226	G	0	culvert	107	20	21.7	7	2.5	908	2.1	8.31	18.49	24.35	36.77	41.63	6.21	16.39	22.25	34.67	39.53	10.18	16.04	28.46	33.32	5.86	18.27	23.14	12.42	17.28	4.86
10/7/2020	291	G	0	culvert	125	40	21.4	7	4	898	7.71	16.11	18.21	24.42	37.57	42.51	8.41	10.51	16.71	29.86	34.8	2.1	8.31	21.46	26.4	6.21	19.35	24.29	13.15	18.09	4.94
12/8/2020	343	G	0	culvert	239	45	16	6.9	7.4	974	1.84	2.99	10.7	19.1	21.21	27.41	1.15	8.86	17.27	19.37	25.57	7.7	16.11	18.21	24.42	8.41	10.51	16.72	2.1	8.31	6.21
2/10/2021	41	H	1	culvert	204	100	21.1	6.9	4.3	913	3.49	13.36	15.23	16.38	20.17	32.5	9.87	11.74	12.9	16.68	29.01	1.87	3.02	6.81	19.14	1.15	4.94	17.27	3.79	16.12	12.33
5/10/2021	130	H	1	culvert	124	60	21.5	6.8	5.5	824	13.77	17.35	22.84	26.92	36.2	38.03	3.59	9.07	13.15	22.43	24.26	5.48	9.56	18.85	20.68	4.08	13.36	15.2	9.29	11.12	1.83
7/20/2021	201	H	1	culvert	193	120	22	6.6	4.5	910	6.86	28.68	47.98	52.32	53.72	59.73	21.82	41.12	45.46	46.86	52.87	19.3	23.64	25.04	31.05	4.34	5.74	11.74	1.4	7.4	6.01
